# Supplementary material
Source: publisher site journal article supplement (https://en-cdn.bio-protocol.org/attached/file/20201114/Supplementary%20file%20Template%20for%20processing.xlsx)
Supplement: Supplementary file 1 [file Supplementary%20file%20Template%20for%20processing.xlsx]

## Sheet: PQ1 
The fluorescence intensity values on this sheet are not based on a real experiment but are simply their to illustrate how the data processing works. Replace the fluorescence intensity values with those obtained from your own experiment and use the Normalised FI for downstream processing.
	Name			Mean FI
	Control protein		Control + DMSO	50.25
	Target protein		Target + DMSO	1005
		Baselined maximum signal	954.75
	Well Column	Well Row	Well	Thiol	Compound	Fluorescence intensity (FI)	Baselined FI	Normalised FI
	1	A	A1	Control protein	DMSO	50	-0.25	-0.000261849
	1	B	B1	Control protein	DMSO	53	2.75	0.00288034
	1	C	C1	Control protein	DMSO	48	-2.25	-0.00235664
	1	D	D1	Control protein	DMSO	52	1.75	0.00183294
	1	E	E1	Control protein	DMSO	49	-1.25	-0.00130924
	1	F	F1	Control protein	DMSO	56	5.75	0.00602252
	1	G	G1	Control protein	DMSO	41	-9.25	-0.0096884
	1	H	H1	Control protein	DMSO	53	2.75	0.00288034
	1	I	I1	Control protein	DMSO	50	-0.25	-0.000261849
	1	J	J1	Control protein	DMSO	53	2.75	0.00288034
	1	K	K1	Control protein	DMSO	48	-2.25	-0.00235664
	1	L	L1	Control protein	DMSO	52	1.75	0.00183294
	1	M	M1	Control protein	DMSO	49	-1.25	-0.00130924
	1	N	N1	Control protein	DMSO	56	5.75	0.00602252
	1	O	O1	Control protein	DMSO	41	-9.25	-0.0096884
	1	P	P1	Control protein	DMSO	53	2.75	0.00288034
	2	A	A2	Control protein	DMSO	50	-0.25	-0.000261849
	2	B	B2	Control protein	DMSO	53	2.75	0.00288034
	2	C	C2	Control protein	DMSO	48	-2.25	-0.00235664
	2	D	D2	Control protein	DMSO	52	1.75	0.00183294
	2	E	E2	Control protein	DMSO	49	-1.25	-0.00130924
	2	F	F2	Control protein	DMSO	56	5.75	0.00602252
	2	G	G2	Control protein	DMSO	41	-9.25	-0.0096884
	2	H	H2	Control protein	DMSO	53	2.75	0.00288034
	2	I	I2	Control protein	DMSO	50	-0.25	-0.000261849
	2	J	J2	Control protein	DMSO	53	2.75	0.00288034
	2	K	K2	Control protein	DMSO	48	-2.25	-0.00235664
	2	L	L2	Control protein	DMSO	52	1.75	0.00183294
	2	M	M2	Control protein	DMSO	49	-1.25	-0.00130924
	2	N	N2	Control protein	DMSO	56	5.75	0.00602252
	2	O	O2	Control protein	DMSO	41	-9.25	-0.0096884
	2	P	P2	Control protein	DMSO	53	2.75	0.00288034
	3	A	A3	Target protein	Compound A3	980	929.75	0.973815
	3	B	B3	Target protein	Compound B3	952	901.75	0.944488
	3	C	C3	Target protein	Compound C3	990	939.75	0.984289
	3	D	D3	Target protein	Compound D3	1002	951.75	0.996858
	3	E	E3	Target protein	Compound E3	101	50.75	0.0531553
	3	F	F3	Target protein	Compound F3	876	825.75	0.864886
	3	G	G3	Target protein	Compound G3	989	938.75	0.983242
	3	H	H3	Target protein	Compound H3	566	515.75	0.540194
	3	I	I3	Target protein	Compound I3	1001	950.75	0.99581
	3	J	J3	Target protein	Compound J3	921	870.75	0.912019
	3	K	K3	Target protein	Compound K3	911	860.75	0.901545
	3	L	L3	Target protein	Compound L3	890	839.75	0.87955
	3	M	M3	Target protein	Compound M3	999	948.75	0.993716
	3	N	N3	Target protein	Compound N3	1000	949.75	0.994763
	3	O	O3	Target protein	Compound O3	60	9.75	0.0102121
	3	P	P3	Target protein	Compound P3	965	914.75	0.958104
	4	A	A4	Target protein	Compound A4	989	938.75	0.983242
	4	B	B4	Target protein	Compound B4	980	929.75	0.973815
	4	C	C4	Target protein	Compound C4	952	901.75	0.944488
	4	D	D4	Target protein	Compound D4	990	939.75	0.984289
	4	E	E4	Target protein	Compound E4	1002	951.75	0.996858
	4	F	F4	Target protein	Compound F4	101	50.75	0.0531553
	4	G	G4	Target protein	Compound G4	876	825.75	0.864886
	4	H	H4	Target protein	Compound H4	989	938.75	0.983242
	4	I	I4	Target protein	Compound I4	566	515.75	0.540194
	4	J	J4	Target protein	Compound J4	1001	950.75	0.99581
	4	K	K4	Target protein	Compound K4	921	870.75	0.912019
	4	L	L4	Target protein	Compound L4	911	860.75	0.901545
	4	M	M4	Target protein	Compound M4	890	839.75	0.87955
	4	N	N4	Target protein	Compound N4	999	948.75	0.993716
	4	O	O4	Target protein	Compound O4	1000	949.75	0.994763
	4	P	P4	Target protein	Compound P4	60	9.75	0.0102121
	5	A	A5	Target protein	Compound A5	965	914.75	0.958104
	5	B	B5	Target protein	Compound B5	989	938.75	0.983242
	5	C	C5	Target protein	Compound C5	980	929.75	0.973815
	5	D	D5	Target protein	Compound D5	952	901.75	0.944488
	5	E	E5	Target protein	Compound E5	990	939.75	0.984289
	5	F	F5	Target protein	Compound F5	1002	951.75	0.996858
	5	G	G5	Target protein	Compound G5	101	50.75	0.0531553
	5	H	H5	Target protein	Compound H5	876	825.75	0.864886
	5	I	I5	Target protein	Compound I5	989	938.75	0.983242
	5	J	J5	Target protein	Compound J5	566	515.75	0.540194
	5	K	K5	Target protein	Compound K5	1001	950.75	0.99581
	5	L	L5	Target protein	Compound L5	921	870.75	0.912019
	5	M	M5	Target protein	Compound M5	911	860.75	0.901545
	5	N	N5	Target protein	Compound N5	890	839.75	0.87955
	5	O	O5	Target protein	Compound O5	999	948.75	0.993716
	5	P	P5	Target protein	Compound P5	1000	949.75	0.994763
	6	A	A6	Target protein	Compound A6	60	9.75	0.0102121
	6	B	B6	Target protein	Compound B6	965	914.75	0.958104
	6	C	C6	Target protein	Compound C6	989	938.75	0.983242
	6	D	D6	Target protein	Compound D6	980	929.75	0.973815
	6	E	E6	Target protein	Compound E6	952	901.75	0.944488
	6	F	F6	Target protein	Compound F6	990	939.75	0.984289
	6	G	G6	Target protein	Compound G6	1002	951.75	0.996858
	6	H	H6	Target protein	Compound H6	101	50.75	0.0531553
	6	I	I6	Target protein	Compound I6	876	825.75	0.864886
	6	J	J6	Target protein	Compound J6	989	938.75	0.983242
	6	K	K6	Target protein	Compound K6	566	515.75	0.540194
	6	L	L6	Target protein	Compound L6	1001	950.75	0.99581
	6	M	M6	Target protein	Compound M6	921	870.75	0.912019
	6	N	N6	Target protein	Compound N6	911	860.75	0.901545
	6	O	O6	Target protein	Compound O6	890	839.75	0.87955
	6	P	P6	Target protein	Compound P6	999	948.75	0.993716
	7	A	A7	Target protein	Compound A7	1000	949.75	0.994763
	7	B	B7	Target protein	Compound B7	60	9.75	0.0102121
	7	C	C7	Target protein	Compound C7	965	914.75	0.958104
	7	D	D7	Target protein	Compound D7	989	938.75	0.983242
	7	E	E7	Target protein	Compound E7	980	929.75	0.973815
	7	F	F7	Target protein	Compound F7	952	901.75	0.944488
	7	G	G7	Target protein	Compound G7	990	939.75	0.984289
	7	H	H7	Target protein	Compound H7	1002	951.75	0.996858
	7	I	I7	Target protein	Compound I7	101	50.75	0.0531553
	7	J	J7	Target protein	Compound J7	876	825.75	0.864886
	7	K	K7	Target protein	Compound K7	989	938.75	0.983242
	7	L	L7	Target protein	Compound L7	566	515.75	0.540194
	7	M	M7	Target protein	Compound M7	1001	950.75	0.99581
	7	N	N7	Target protein	Compound N7	921	870.75	0.912019
	7	O	O7	Target protein	Compound O7	911	860.75	0.901545
	7	P	P7	Target protein	Compound P7	890	839.75	0.87955
	8	A	A8	Target protein	Compound A8	999	948.75	0.993716
	8	B	B8	Target protein	Compound B8	1000	949.75	0.994763
	8	C	C8	Target protein	Compound C8	60	9.75	0.0102121
	8	D	D8	Target protein	Compound D8	965	914.75	0.958104
	8	E	E8	Target protein	Compound E8	989	938.75	0.983242
	8	F	F8	Target protein	Compound F8	980	929.75	0.973815
	8	G	G8	Target protein	Compound G8	952	901.75	0.944488
	8	H	H8	Target protein	Compound H8	990	939.75	0.984289
	8	I	I8	Target protein	Compound I8	1002	951.75	0.996858
	8	J	J8	Target protein	Compound J8	101	50.75	0.0531553
	8	K	K8	Target protein	Compound K8	876	825.75	0.864886
	8	L	L8	Target protein	Compound L8	989	938.75	0.983242
	8	M	M8	Target protein	Compound M8	566	515.75	0.540194
	8	N	N8	Target protein	Compound N8	1001	950.75	0.99581
	8	O	O8	Target protein	Compound O8	921	870.75	0.912019
	8	P	P8	Target protein	Compound P8	911	860.75	0.901545
	9	A	A9	Target protein	Compound A9	890	839.75	0.87955
	9	B	B9	Target protein	Compound B9	999	948.75	0.993716
	9	C	C9	Target protein	Compound C9	1000	949.75	0.994763
	9	D	D9	Target protein	Compound D9	60	9.75	0.0102121
	9	E	E9	Target protein	Compound E9	965	914.75	0.958104
	9	F	F9	Target protein	Compound F9	989	938.75	0.983242
	9	G	G9	Target protein	Compound G9	980	929.75	0.973815
	9	H	H9	Target protein	Compound H9	952	901.75	0.944488
	9	I	I9	Target protein	Compound I9	990	939.75	0.984289
	9	J	J9	Target protein	Compound J9	1002	951.75	0.996858
	9	K	K9	Target protein	Compound K9	101	50.75	0.0531553
	9	L	L9	Target protein	Compound L9	876	825.75	0.864886
	9	M	M9	Target protein	Compound M9	989	938.75	0.983242
	9	N	N9	Target protein	Compound N9	566	515.75	0.540194
	9	O	O9	Target protein	Compound O9	1001	950.75	0.99581
	9	P	P9	Target protein	Compound P9	921	870.75	0.912019
	10	A	A10	Target protein	Compound A10	911	860.75	0.901545
	10	B	B10	Target protein	Compound B10	890	839.75	0.87955
	10	C	C10	Target protein	Compound C10	999	948.75	0.993716
	10	D	D10	Target protein	Compound D10	1000	949.75	0.994763
	10	E	E10	Target protein	Compound E10	60	9.75	0.0102121
	10	F	F10	Target protein	Compound F10	965	914.75	0.958104
	10	G	G10	Target protein	Compound G10	989	938.75	0.983242
	10	H	H10	Target protein	Compound H10	980	929.75	0.973815
	10	I	I10	Target protein	Compound I10	952	901.75	0.944488
	10	J	J10	Target protein	Compound J10	990	939.75	0.984289
	10	K	K10	Target protein	Compound K10	1002	951.75	0.996858
	10	L	L10	Target protein	Compound L10	101	50.75	0.0531553
	10	M	M10	Target protein	Compound M10	876	825.75	0.864886
	10	N	N10	Target protein	Compound N10	989	938.75	0.983242
	10	O	O10	Target protein	Compound O10	566	515.75	0.540194
	10	P	P10	Target protein	Compound P10	1001	950.75	0.99581
	11	A	A11	Target protein	Compound A11	921	870.75	0.912019
	11	B	B11	Target protein	Compound B11	911	860.75	0.901545
	11	C	C11	Target protein	Compound C11	890	839.75	0.87955
	11	D	D11	Target protein	Compound D11	999	948.75	0.993716
	11	E	E11	Target protein	Compound E11	1000	949.75	0.994763
	11	F	F11	Target protein	Compound F11	60	9.75	0.0102121
	11	G	G11	Target protein	Compound G11	965	914.75	0.958104
	11	H	H11	Target protein	Compound H11	989	938.75	0.983242
	11	I	I11	Target protein	Compound I11	980	929.75	0.973815
	11	J	J11	Target protein	Compound J11	952	901.75	0.944488
	11	K	K11	Target protein	Compound K11	990	939.75	0.984289
	11	L	L11	Target protein	Compound L11	1002	951.75	0.996858
	11	M	M11	Target protein	Compound M11	101	50.75	0.0531553
	11	N	N11	Target protein	Compound N11	876	825.75	0.864886
	11	O	O11	Target protein	Compound O11	989	938.75	0.983242
	11	P	P11	Target protein	Compound P11	566	515.75	0.540194
	12	A	A12	Target protein	Compound A12	1001	950.75	0.99581
	12	B	B12	Target protein	Compound B12	921	870.75	0.912019
	12	C	C12	Target protein	Compound C12	911	860.75	0.901545
	12	D	D12	Target protein	Compound D12	890	839.75	0.87955
	12	E	E12	Target protein	Compound E12	999	948.75	0.993716
	12	F	F12	Target protein	Compound F12	1000	949.75	0.994763
	12	G	G12	Target protein	Compound G12	60	9.75	0.0102121
	12	H	H12	Target protein	Compound H12	965	914.75	0.958104
	12	I	I12	Target protein	Compound I12	989	938.75	0.983242
	12	J	J12	Target protein	Compound J12	980	929.75	0.973815
	12	K	K12	Target protein	Compound K12	952	901.75	0.944488
	12	L	L12	Target protein	Compound L12	990	939.75	0.984289
	12	M	M12	Target protein	Compound M12	1002	951.75	0.996858
	12	N	N12	Target protein	Compound N12	101	50.75	0.0531553
	12	O	O12	Target protein	Compound O12	876	825.75	0.864886
	12	P	P12	Target protein	Compound P12	989	938.75	0.983242
	13	A	A13	Target protein	Compound A13	566	515.75	0.540194
	13	B	B13	Target protein	Compound B13	1001	950.75	0.99581
	13	C	C13	Target protein	Compound C13	921	870.75	0.912019
	13	D	D13	Target protein	Compound D13	911	860.75	0.901545
	13	E	E13	Target protein	Compound E13	890	839.75	0.87955
	13	F	F13	Target protein	Compound F13	999	948.75	0.993716
	13	G	G13	Target protein	Compound G13	1000	949.75	0.994763
	13	H	H13	Target protein	Compound H13	60	9.75	0.0102121
	13	I	I13	Target protein	Compound I13	965	914.75	0.958104
	13	J	J13	Target protein	Compound J13	989	938.75	0.983242
	13	K	K13	Target protein	Compound K13	980	929.75	0.973815
	13	L	L13	Target protein	Compound L13	952	901.75	0.944488
	13	M	M13	Target protein	Compound M13	990	939.75	0.984289
	13	N	N13	Target protein	Compound N13	1002	951.75	0.996858
	13	O	O13	Target protein	Compound O13	101	50.75	0.0531553
	13	P	P13	Target protein	Compound P13	876	825.75	0.864886
	14	A	A14	Target protein	Compound A14	989	938.75	0.983242
	14	B	B14	Target protein	Compound B14	566	515.75	0.540194
	14	C	C14	Target protein	Compound C14	1001	950.75	0.99581
	14	D	D14	Target protein	Compound D14	921	870.75	0.912019
	14	E	E14	Target protein	Compound E14	911	860.75	0.901545
	14	F	F14	Target protein	Compound F14	890	839.75	0.87955
	14	G	G14	Target protein	Compound G14	999	948.75	0.993716
	14	H	H14	Target protein	Compound H14	1000	949.75	0.994763
	14	I	I14	Target protein	Compound I14	60	9.75	0.0102121
	14	J	J14	Target protein	Compound J14	965	914.75	0.958104
	14	K	K14	Target protein	Compound K14	989	938.75	0.983242
	14	L	L14	Target protein	Compound L14	980	929.75	0.973815
	14	M	M14	Target protein	Compound M14	952	901.75	0.944488
	14	N	N14	Target protein	Compound N14	990	939.75	0.984289
	14	O	O14	Target protein	Compound O14	1002	951.75	0.996858
	14	P	P14	Target protein	Compound P14	101	50.75	0.0531553
	15	A	A15	Target protein	Compound A15	876	825.75	0.864886
	15	B	B15	Target protein	Compound B15	989	938.75	0.983242
	15	C	C15	Target protein	Compound C15	566	515.75	0.540194
	15	D	D15	Target protein	Compound D15	1001	950.75	0.99581
	15	E	E15	Target protein	Compound E15	921	870.75	0.912019
	15	F	F15	Target protein	Compound F15	911	860.75	0.901545
	15	G	G15	Target protein	Compound G15	890	839.75	0.87955
	15	H	H15	Target protein	Compound H15	999	948.75	0.993716
	15	I	I15	Target protein	Compound I15	1000	949.75	0.994763
	15	J	J15	Target protein	Compound J15	60	9.75	0.0102121
	15	K	K15	Target protein	Compound K15	965	914.75	0.958104
	15	L	L15	Target protein	Compound L15	989	938.75	0.983242
	15	M	M15	Target protein	Compound M15	980	929.75	0.973815
	15	N	N15	Target protein	Compound N15	952	901.75	0.944488
	15	O	O15	Target protein	Compound O15	990	939.75	0.984289
	15	P	P15	Target protein	Compound P15	1002	951.75	0.996858
	16	A	A16	Target protein	Compound A16	101	50.75	0.0531553
	16	B	B16	Target protein	Compound B16	876	825.75	0.864886
	16	C	C16	Target protein	Compound C16	989	938.75	0.983242
	16	D	D16	Target protein	Compound D16	566	515.75	0.540194
	16	E	E16	Target protein	Compound E16	1001	950.75	0.99581
	16	F	F16	Target protein	Compound F16	921	870.75	0.912019
	16	G	G16	Target protein	Compound G16	911	860.75	0.901545
	16	H	H16	Target protein	Compound H16	890	839.75	0.87955
	16	I	I16	Target protein	Compound I16	999	948.75	0.993716
	16	J	J16	Target protein	Compound J16	1000	949.75	0.994763
	16	K	K16	Target protein	Compound K16	60	9.75	0.0102121
	16	L	L16	Target protein	Compound L16	965	914.75	0.958104
	16	M	M16	Target protein	Compound M16	989	938.75	0.983242
	16	N	N16	Target protein	Compound N16	980	929.75	0.973815
	16	O	O16	Target protein	Compound O16	952	901.75	0.944488
	16	P	P16	Target protein	Compound P16	990	939.75	0.984289
	17	A	A17	Target protein	Compound A17	1002	951.75	0.996858
	17	B	B17	Target protein	Compound B17	101	50.75	0.0531553
	17	C	C17	Target protein	Compound C17	876	825.75	0.864886
	17	D	D17	Target protein	Compound D17	989	938.75	0.983242
	17	E	E17	Target protein	Compound E17	566	515.75	0.540194
	17	F	F17	Target protein	Compound F17	1001	950.75	0.99581
	17	G	G17	Target protein	Compound G17	921	870.75	0.912019
	17	H	H17	Target protein	Compound H17	911	860.75	0.901545
	17	I	I17	Target protein	Compound I17	890	839.75	0.87955
	17	J	J17	Target protein	Compound J17	999	948.75	0.993716
	17	K	K17	Target protein	Compound K17	1000	949.75	0.994763
	17	L	L17	Target protein	Compound L17	60	9.75	0.0102121
	17	M	M17	Target protein	Compound M17	965	914.75	0.958104
	17	N	N17	Target protein	Compound N17	989	938.75	0.983242
	17	O	O17	Target protein	Compound O17	980	929.75	0.973815
	17	P	P17	Target protein	Compound P17	952	901.75	0.944488
	18	A	A18	Target protein	Compound A18	990	939.75	0.984289
	18	B	B18	Target protein	Compound B18	1002	951.75	0.996858
	18	C	C18	Target protein	Compound C18	101	50.75	0.0531553
	18	D	D18	Target protein	Compound D18	876	825.75	0.864886
	18	E	E18	Target protein	Compound E18	989	938.75	0.983242
	18	F	F18	Target protein	Compound F18	566	515.75	0.540194
	18	G	G18	Target protein	Compound G18	1001	950.75	0.99581
	18	H	H18	Target protein	Compound H18	921	870.75	0.912019
	18	I	I18	Target protein	Compound I18	911	860.75	0.901545
	18	J	J18	Target protein	Compound J18	890	839.75	0.87955
	18	K	K18	Target protein	Compound K18	999	948.75	0.993716
	18	L	L18	Target protein	Compound L18	1000	949.75	0.994763
	18	M	M18	Target protein	Compound M18	60	9.75	0.0102121
	18	N	N18	Target protein	Compound N18	965	914.75	0.958104
	18	O	O18	Target protein	Compound O18	989	938.75	0.983242
	18	P	P18	Target protein	Compound P18	980	929.75	0.973815
	19	A	A19	Target protein	Compound A19	952	901.75	0.944488
	19	B	B19	Target protein	Compound B19	990	939.75	0.984289
	19	C	C19	Target protein	Compound C19	1002	951.75	0.996858
	19	D	D19	Target protein	Compound D19	101	50.75	0.0531553
	19	E	E19	Target protein	Compound E19	876	825.75	0.864886
	19	F	F19	Target protein	Compound F19	989	938.75	0.983242
	19	G	G19	Target protein	Compound G19	566	515.75	0.540194
	19	H	H19	Target protein	Compound H19	1001	950.75	0.99581
	19	I	I19	Target protein	Compound I19	921	870.75	0.912019
	19	J	J19	Target protein	Compound J19	911	860.75	0.901545
	19	K	K19	Target protein	Compound K19	890	839.75	0.87955
	19	L	L19	Target protein	Compound L19	999	948.75	0.993716
	19	M	M19	Target protein	Compound M19	1000	949.75	0.994763
	19	N	N19	Target protein	Compound N19	60	9.75	0.0102121
	19	O	O19	Target protein	Compound O19	965	914.75	0.958104
	19	P	P19	Target protein	Compound P19	989	938.75	0.983242
	20	A	A20	Target protein	Compound A20	980	929.75	0.973815
	20	B	B20	Target protein	Compound B20	952	901.75	0.944488
	20	C	C20	Target protein	Compound C20	990	939.75	0.984289
	20	D	D20	Target protein	Compound D20	1002	951.75	0.996858
	20	E	E20	Target protein	Compound E20	101	50.75	0.0531553
	20	F	F20	Target protein	Compound F20	876	825.75	0.864886
	20	G	G20	Target protein	Compound G20	989	938.75	0.983242
	20	H	H20	Target protein	Compound H20	566	515.75	0.540194
	20	I	I20	Target protein	Compound I20	1001	950.75	0.99581
	20	J	J20	Target protein	Compound J20	921	870.75	0.912019
	20	K	K20	Target protein	Compound K20	911	860.75	0.901545
	20	L	L20	Target protein	Compound L20	890	839.75	0.87955
	20	M	M20	Target protein	Compound M20	999	948.75	0.993716
	20	N	N20	Target protein	Compound N20	1000	949.75	0.994763
	20	O	O20	Target protein	Compound O20	60	9.75	0.0102121
	20	P	P20	Target protein	Compound P20	965	914.75	0.958104
	21	A	A21	Target protein	Compound A21	989	938.75	0.983242
	21	B	B21	Target protein	Compound B21	980	929.75	0.973815
	21	C	C21	Target protein	Compound C21	952	901.75	0.944488
	21	D	D21	Target protein	Compound D21	990	939.75	0.984289
	21	E	E21	Target protein	Compound E21	1002	951.75	0.996858
	21	F	F21	Target protein	Compound F21	101	50.75	0.0531553
	21	G	G21	Target protein	Compound G21	876	825.75	0.864886
	21	H	H21	Target protein	Compound H21	989	938.75	0.983242
	21	I	I21	Target protein	Compound I21	566	515.75	0.540194
	21	J	J21	Target protein	Compound J21	1001	950.75	0.99581
	21	K	K21	Target protein	Compound K21	921	870.75	0.912019
	21	L	L21	Target protein	Compound L21	911	860.75	0.901545
	21	M	M21	Target protein	Compound M21	890	839.75	0.87955
	21	N	N21	Target protein	Compound N21	999	948.75	0.993716
	21	O	O21	Target protein	Compound O21	1000	949.75	0.994763
	21	P	P21	Target protein	Compound P21	60	9.75	0.0102121
	22	A	A22	Target protein	Compound A22	965	914.75	0.958104
	22	B	B22	Target protein	Compound B22	989	938.75	0.983242
	22	C	C22	Target protein	Compound C22	876	825.75	0.864886
	22	D	D22	Target protein	Compound D22	989	938.75	0.983242
	22	E	E22	Target protein	Compound E22	566	515.75	0.540194
	22	F	F22	Target protein	Compound F22	1001	950.75	0.99581
	22	G	G22	Target protein	Compound G22	921	870.75	0.912019
	22	H	H22	Target protein	Compound H22	911	860.75	0.901545
	22	I	I22	Target protein	Compound I22	890	839.75	0.87955
	22	J	J22	Target protein	Compound J22	999	948.75	0.993716
	22	K	K22	Target protein	Compound K22	1000	949.75	0.994763
	22	L	L22	Target protein	Compound L22	60	9.75	0.0102121
	22	M	M22	Target protein	Compound M22	965	914.75	0.958104
	22	N	N22	Target protein	Compound N22	989	938.75	0.983242
	22	O	O22	Target protein	Compound O22	965	914.75	0.958104
	22	P	P22	Target protein	Compound P22	989	938.75	0.983242
	23	A	A23	Target protein	DMSO	1000	949.75	0.994763
	23	B	B23	Target protein	DMSO	1060	1009.75	1.05761
	23	C	C23	Target protein	DMSO	960	909.75	0.952867
	23	D	D23	Target protein	DMSO	1040	989.75	1.03666
	23	E	E23	Target protein	DMSO	980	929.75	0.973815
	23	F	F23	Target protein	DMSO	1120	1069.75	1.12045
	23	G	G23	Target protein	DMSO	820	769.75	0.806232
	23	H	H23	Target protein	DMSO	1060	1009.75	1.05761
	23	I	I23	Target protein	DMSO	1000	949.75	0.994763
	23	J	J23	Target protein	DMSO	1060	1009.75	1.05761
	23	K	K23	Target protein	DMSO	960	909.75	0.952867
	23	L	L23	Target protein	DMSO	1040	989.75	1.03666
	23	M	M23	Target protein	DMSO	980	929.75	0.973815
	23	N	N23	Target protein	DMSO	1120	1069.75	1.12045
	23	O	O23	Target protein	DMSO	820	769.75	0.806232
	23	P	P23	Target protein	DMSO	1060	1009.75	1.05761
	24	A	A24	Target protein	DMSO	1000	949.75	0.994763
	24	B	B24	Target protein	DMSO	1060	1009.75	1.05761
	24	C	C24	Target protein	DMSO	960	909.75	0.952867
	24	D	D24	Target protein	DMSO	1040	989.75	1.03666
	24	E	E24	Target protein	DMSO	980	929.75	0.973815
	24	F	F24	Target protein	DMSO	1120	1069.75	1.12045
	24	G	G24	Target protein	DMSO	820	769.75	0.806232
	24	H	H24	Target protein	DMSO	1060	1009.75	1.05761
	24	I	I24	Target protein	DMSO	1000	949.75	0.994763
	24	J	J24	Target protein	DMSO	1060	1009.75	1.05761
	24	K	K24	Target protein	DMSO	960	909.75	0.952867
	24	L	L24	Target protein	DMSO	1040	989.75	1.03666
	24	M	M24	Target protein	DMSO	980	929.75	0.973815
	24	N	N24	Target protein	DMSO	1120	1069.75	1.12045
	24	O	O24	Target protein	DMSO	820	769.75	0.806232
	24	P	P24	Target protein	DMSO	1060	1009.75	1.05761

## Sheet: GQ1
The fluorescence intensity values on this sheet are not based on a real experiment but are simply their to illustrate how the data processing works. Replace the fluorescence intensity values with those obtained from your own experiment and use the Normalised FI for downstream processing.
	Name			Mean FI
	Buffer		Control + DMSO	50.25
	GSH		Target + DMSO	502.5
		Baselined maximum signal	452.25
	Well Column	Well Row	Well	Thiol	Compound	Fluorescence intensity (FI)	Baselined FI	Normalised FI
	1	A	A1	Buffer	DMSO	50	-0.25	-0.000552792
	1	B	B1	Buffer	DMSO	53	2.75	0.00608071
	1	C	C1	Buffer	DMSO	48	-2.25	-0.00497512
	1	D	D1	Buffer	DMSO	52	1.75	0.00386954
	1	E	E1	Buffer	DMSO	49	-1.25	-0.00276396
	1	F	F1	Buffer	DMSO	56	5.75	0.0127142
	1	G	G1	Buffer	DMSO	41	-9.25	-0.0204533
	1	H	H1	Buffer	DMSO	53	2.75	0.00608071
	1	I	I1	Buffer	DMSO	50	-0.25	-0.000552792
	1	J	J1	Buffer	DMSO	53	2.75	0.00608071
	1	K	K1	Buffer	DMSO	48	-2.25	-0.00497512
	1	L	L1	Buffer	DMSO	52	1.75	0.00386954
	1	M	M1	Buffer	DMSO	49	-1.25	-0.00276396
	1	N	N1	Buffer	DMSO	56	5.75	0.0127142
	1	O	O1	Buffer	DMSO	41	-9.25	-0.0204533
	1	P	P1	Buffer	DMSO	53	2.75	0.00608071
	2	A	A2	Buffer	DMSO	50	-0.25	-0.000552792
	2	B	B2	Buffer	DMSO	53	2.75	0.00608071
	2	C	C2	Buffer	DMSO	48	-2.25	-0.00497512
	2	D	D2	Buffer	DMSO	52	1.75	0.00386954
	2	E	E2	Buffer	DMSO	49	-1.25	-0.00276396
	2	F	F2	Buffer	DMSO	56	5.75	0.0127142
	2	G	G2	Buffer	DMSO	41	-9.25	-0.0204533
	2	H	H2	Buffer	DMSO	53	2.75	0.00608071
	2	I	I2	Buffer	DMSO	50	-0.25	-0.000552792
	2	J	J2	Buffer	DMSO	53	2.75	0.00608071
	2	K	K2	Buffer	DMSO	48	-2.25	-0.00497512
	2	L	L2	Buffer	DMSO	52	1.75	0.00386954
	2	M	M2	Buffer	DMSO	49	-1.25	-0.00276396
	2	N	N2	Buffer	DMSO	56	5.75	0.0127142
	2	O	O2	Buffer	DMSO	41	-9.25	-0.0204533
	2	P	P2	Buffer	DMSO	53	2.75	0.00608071
	3	A	A3	GSH	Compound A3	490	439.75	0.97236
	3	B	B3	GSH	Compound B3	476	425.75	0.941404
	3	C	C3	GSH	Compound C3	495	444.75	0.983416
	3	D	D3	GSH	Compound D3	501	450.75	0.996683
	3	E	E3	GSH	Compound E3	50.5	0.25	0.000552792
	3	F	F3	GSH	Compound F3	438	387.75	0.85738
	3	G	G3	GSH	Compound G3	494.5	444.25	0.982311
	3	H	H3	GSH	Compound H3	283	232.75	0.514649
	3	I	I3	GSH	Compound I3	500.5	450.25	0.995578
	3	J	J3	GSH	Compound J3	460.5	410.25	0.907131
	3	K	K3	GSH	Compound K3	455.5	405.25	0.896075
	3	L	L3	GSH	Compound L3	445	394.75	0.872858
	3	M	M3	GSH	Compound M3	499.5	449.25	0.993367
	3	N	N3	GSH	Compound N3	500	449.75	0.994472
	3	O	O3	GSH	Compound O3	30	-20.25	-0.0447761
	3	P	P3	GSH	Compound P3	482.5	432.25	0.955777
	4	A	A4	GSH	Compound A4	494.5	444.25	0.982311
	4	B	B4	GSH	Compound B4	490	439.75	0.97236
	4	C	C4	GSH	Compound C4	476	425.75	0.941404
	4	D	D4	GSH	Compound D4	495	444.75	0.983416
	4	E	E4	GSH	Compound E4	501	450.75	0.996683
	4	F	F4	GSH	Compound F4	50.5	0.25	0.000552792
	4	G	G4	GSH	Compound G4	438	387.75	0.85738
	4	H	H4	GSH	Compound H4	494.5	444.25	0.982311
	4	I	I4	GSH	Compound I4	283	232.75	0.514649
	4	J	J4	GSH	Compound J4	500.5	450.25	0.995578
	4	K	K4	GSH	Compound K4	460.5	410.25	0.907131
	4	L	L4	GSH	Compound L4	455.5	405.25	0.896075
	4	M	M4	GSH	Compound M4	445	394.75	0.872858
	4	N	N4	GSH	Compound N4	499.5	449.25	0.993367
	4	O	O4	GSH	Compound O4	500	449.75	0.994472
	4	P	P4	GSH	Compound P4	30	-20.25	-0.0447761
	5	A	A5	GSH	Compound A5	482.5	432.25	0.955777
	5	B	B5	GSH	Compound B5	494.5	444.25	0.982311
	5	C	C5	GSH	Compound C5	490	439.75	0.97236
	5	D	D5	GSH	Compound D5	476	425.75	0.941404
	5	E	E5	GSH	Compound E5	495	444.75	0.983416
	5	F	F5	GSH	Compound F5	501	450.75	0.996683
	5	G	G5	GSH	Compound G5	50.5	0.25	0.000552792
	5	H	H5	GSH	Compound H5	438	387.75	0.85738
	5	I	I5	GSH	Compound I5	494.5	444.25	0.982311
	5	J	J5	GSH	Compound J5	283	232.75	0.514649
	5	K	K5	GSH	Compound K5	500.5	450.25	0.995578
	5	L	L5	GSH	Compound L5	460.5	410.25	0.907131
	5	M	M5	GSH	Compound M5	455.5	405.25	0.896075
	5	N	N5	GSH	Compound N5	445	394.75	0.872858
	5	O	O5	GSH	Compound O5	499.5	449.25	0.993367
	5	P	P5	GSH	Compound P5	500	449.75	0.994472
	6	A	A6	GSH	Compound A6	30	-20.25	-0.0447761
	6	B	B6	GSH	Compound B6	482.5	432.25	0.955777
	6	C	C6	GSH	Compound C6	494.5	444.25	0.982311
	6	D	D6	GSH	Compound D6	490	439.75	0.97236
	6	E	E6	GSH	Compound E6	476	425.75	0.941404
	6	F	F6	GSH	Compound F6	495	444.75	0.983416
	6	G	G6	GSH	Compound G6	501	450.75	0.996683
	6	H	H6	GSH	Compound H6	50.5	0.25	0.000552792
	6	I	I6	GSH	Compound I6	438	387.75	0.85738
	6	J	J6	GSH	Compound J6	494.5	444.25	0.982311
	6	K	K6	GSH	Compound K6	283	232.75	0.514649
	6	L	L6	GSH	Compound L6	500.5	450.25	0.995578
	6	M	M6	GSH	Compound M6	460.5	410.25	0.907131
	6	N	N6	GSH	Compound N6	455.5	405.25	0.896075
	6	O	O6	GSH	Compound O6	445	394.75	0.872858
	6	P	P6	GSH	Compound P6	499.5	449.25	0.993367
	7	A	A7	GSH	Compound A7	500	449.75	0.994472
	7	B	B7	GSH	Compound B7	30	-20.25	-0.0447761
	7	C	C7	GSH	Compound C7	482.5	432.25	0.955777
	7	D	D7	GSH	Compound D7	494.5	444.25	0.982311
	7	E	E7	GSH	Compound E7	490	439.75	0.97236
	7	F	F7	GSH	Compound F7	476	425.75	0.941404
	7	G	G7	GSH	Compound G7	495	444.75	0.983416
	7	H	H7	GSH	Compound H7	501	450.75	0.996683
	7	I	I7	GSH	Compound I7	50.5	0.25	0.000552792
	7	J	J7	GSH	Compound J7	438	387.75	0.85738
	7	K	K7	GSH	Compound K7	494.5	444.25	0.982311
	7	L	L7	GSH	Compound L7	283	232.75	0.514649
	7	M	M7	GSH	Compound M7	500.5	450.25	0.995578
	7	N	N7	GSH	Compound N7	460.5	410.25	0.907131
	7	O	O7	GSH	Compound O7	455.5	405.25	0.896075
	7	P	P7	GSH	Compound P7	445	394.75	0.872858
	8	A	A8	GSH	Compound A8	499.5	449.25	0.993367
	8	B	B8	GSH	Compound B8	500	449.75	0.994472
	8	C	C8	GSH	Compound C8	30	-20.25	-0.0447761
	8	D	D8	GSH	Compound D8	482.5	432.25	0.955777
	8	E	E8	GSH	Compound E8	494.5	444.25	0.982311
	8	F	F8	GSH	Compound F8	490	439.75	0.97236
	8	G	G8	GSH	Compound G8	476	425.75	0.941404
	8	H	H8	GSH	Compound H8	495	444.75	0.983416
	8	I	I8	GSH	Compound I8	501	450.75	0.996683
	8	J	J8	GSH	Compound J8	50.5	0.25	0.000552792
	8	K	K8	GSH	Compound K8	438	387.75	0.85738
	8	L	L8	GSH	Compound L8	494.5	444.25	0.982311
	8	M	M8	GSH	Compound M8	283	232.75	0.514649
	8	N	N8	GSH	Compound N8	500.5	450.25	0.995578
	8	O	O8	GSH	Compound O8	460.5	410.25	0.907131
	8	P	P8	GSH	Compound P8	455.5	405.25	0.896075
	9	A	A9	GSH	Compound A9	445	394.75	0.872858
	9	B	B9	GSH	Compound B9	499.5	449.25	0.993367
	9	C	C9	GSH	Compound C9	500	449.75	0.994472
	9	D	D9	GSH	Compound D9	30	-20.25	-0.0447761
	9	E	E9	GSH	Compound E9	482.5	432.25	0.955777
	9	F	F9	GSH	Compound F9	494.5	444.25	0.982311
	9	G	G9	GSH	Compound G9	490	439.75	0.97236
	9	H	H9	GSH	Compound H9	476	425.75	0.941404
	9	I	I9	GSH	Compound I9	495	444.75	0.983416
	9	J	J9	GSH	Compound J9	501	450.75	0.996683
	9	K	K9	GSH	Compound K9	50.5	0.25	0.000552792
	9	L	L9	GSH	Compound L9	438	387.75	0.85738
	9	M	M9	GSH	Compound M9	494.5	444.25	0.982311
	9	N	N9	GSH	Compound N9	283	232.75	0.514649
	9	O	O9	GSH	Compound O9	500.5	450.25	0.995578
	9	P	P9	GSH	Compound P9	460.5	410.25	0.907131
	10	A	A10	GSH	Compound A10	455.5	405.25	0.896075
	10	B	B10	GSH	Compound B10	445	394.75	0.872858
	10	C	C10	GSH	Compound C10	499.5	449.25	0.993367
	10	D	D10	GSH	Compound D10	500	449.75	0.994472
	10	E	E10	GSH	Compound E10	30	-20.25	-0.0447761
	10	F	F10	GSH	Compound F10	482.5	432.25	0.955777
	10	G	G10	GSH	Compound G10	494.5	444.25	0.982311
	10	H	H10	GSH	Compound H10	490	439.75	0.97236
	10	I	I10	GSH	Compound I10	476	425.75	0.941404
	10	J	J10	GSH	Compound J10	495	444.75	0.983416
	10	K	K10	GSH	Compound K10	501	450.75	0.996683
	10	L	L10	GSH	Compound L10	50.5	0.25	0.000552792
	10	M	M10	GSH	Compound M10	438	387.75	0.85738
	10	N	N10	GSH	Compound N10	494.5	444.25	0.982311
	10	O	O10	GSH	Compound O10	283	232.75	0.514649
	10	P	P10	GSH	Compound P10	500.5	450.25	0.995578
	11	A	A11	GSH	Compound A11	460.5	410.25	0.907131
	11	B	B11	GSH	Compound B11	455.5	405.25	0.896075
	11	C	C11	GSH	Compound C11	445	394.75	0.872858
	11	D	D11	GSH	Compound D11	499.5	449.25	0.993367
	11	E	E11	GSH	Compound E11	500	449.75	0.994472
	11	F	F11	GSH	Compound F11	30	-20.25	-0.0447761
	11	G	G11	GSH	Compound G11	482.5	432.25	0.955777
	11	H	H11	GSH	Compound H11	494.5	444.25	0.982311
	11	I	I11	GSH	Compound I11	490	439.75	0.97236
	11	J	J11	GSH	Compound J11	476	425.75	0.941404
	11	K	K11	GSH	Compound K11	495	444.75	0.983416
	11	L	L11	GSH	Compound L11	501	450.75	0.996683
	11	M	M11	GSH	Compound M11	50.5	0.25	0.000552792
	11	N	N11	GSH	Compound N11	438	387.75	0.85738
	11	O	O11	GSH	Compound O11	494.5	444.25	0.982311
	11	P	P11	GSH	Compound P11	283	232.75	0.514649
	12	A	A12	GSH	Compound A12	500.5	450.25	0.995578
	12	B	B12	GSH	Compound B12	460.5	410.25	0.907131
	12	C	C12	GSH	Compound C12	455.5	405.25	0.896075
	12	D	D12	GSH	Compound D12	445	394.75	0.872858
	12	E	E12	GSH	Compound E12	499.5	449.25	0.993367
	12	F	F12	GSH	Compound F12	500	449.75	0.994472
	12	G	G12	GSH	Compound G12	30	-20.25	-0.0447761
	12	H	H12	GSH	Compound H12	482.5	432.25	0.955777
	12	I	I12	GSH	Compound I12	494.5	444.25	0.982311
	12	J	J12	GSH	Compound J12	490	439.75	0.97236
	12	K	K12	GSH	Compound K12	476	425.75	0.941404
	12	L	L12	GSH	Compound L12	495	444.75	0.983416
	12	M	M12	GSH	Compound M12	501	450.75	0.996683
	12	N	N12	GSH	Compound N12	50.5	0.25	0.000552792
	12	O	O12	GSH	Compound O12	438	387.75	0.85738
	12	P	P12	GSH	Compound P12	494.5	444.25	0.982311
	13	A	A13	GSH	Compound A13	283	232.75	0.514649
	13	B	B13	GSH	Compound B13	500.5	450.25	0.995578
	13	C	C13	GSH	Compound C13	460.5	410.25	0.907131
	13	D	D13	GSH	Compound D13	455.5	405.25	0.896075
	13	E	E13	GSH	Compound E13	445	394.75	0.872858
	13	F	F13	GSH	Compound F13	499.5	449.25	0.993367
	13	G	G13	GSH	Compound G13	500	449.75	0.994472
	13	H	H13	GSH	Compound H13	30	-20.25	-0.0447761
	13	I	I13	GSH	Compound I13	482.5	432.25	0.955777
	13	J	J13	GSH	Compound J13	494.5	444.25	0.982311
	13	K	K13	GSH	Compound K13	490	439.75	0.97236
	13	L	L13	GSH	Compound L13	476	425.75	0.941404
	13	M	M13	GSH	Compound M13	495	444.75	0.983416
	13	N	N13	GSH	Compound N13	501	450.75	0.996683
	13	O	O13	GSH	Compound O13	50.5	0.25	0.000552792
	13	P	P13	GSH	Compound P13	438	387.75	0.85738
	14	A	A14	GSH	Compound A14	494.5	444.25	0.982311
	14	B	B14	GSH	Compound B14	283	232.75	0.514649
	14	C	C14	GSH	Compound C14	500.5	450.25	0.995578
	14	D	D14	GSH	Compound D14	460.5	410.25	0.907131
	14	E	E14	GSH	Compound E14	455.5	405.25	0.896075
	14	F	F14	GSH	Compound F14	445	394.75	0.872858
	14	G	G14	GSH	Compound G14	499.5	449.25	0.993367
	14	H	H14	GSH	Compound H14	500	449.75	0.994472
	14	I	I14	GSH	Compound I14	30	-20.25	-0.0447761
	14	J	J14	GSH	Compound J14	482.5	432.25	0.955777
	14	K	K14	GSH	Compound K14	494.5	444.25	0.982311
	14	L	L14	GSH	Compound L14	490	439.75	0.97236
	14	M	M14	GSH	Compound M14	476	425.75	0.941404
	14	N	N14	GSH	Compound N14	495	444.75	0.983416
	14	O	O14	GSH	Compound O14	501	450.75	0.996683
	14	P	P14	GSH	Compound P14	50.5	0.25	0.000552792
	15	A	A15	GSH	Compound A15	438	387.75	0.85738
	15	B	B15	GSH	Compound B15	494.5	444.25	0.982311
	15	C	C15	GSH	Compound C15	283	232.75	0.514649
	15	D	D15	GSH	Compound D15	500.5	450.25	0.995578
	15	E	E15	GSH	Compound E15	460.5	410.25	0.907131
	15	F	F15	GSH	Compound F15	455.5	405.25	0.896075
	15	G	G15	GSH	Compound G15	445	394.75	0.872858
	15	H	H15	GSH	Compound H15	499.5	449.25	0.993367
	15	I	I15	GSH	Compound I15	500	449.75	0.994472
	15	J	J15	GSH	Compound J15	30	-20.25	-0.0447761
	15	K	K15	GSH	Compound K15	482.5	432.25	0.955777
	15	L	L15	GSH	Compound L15	494.5	444.25	0.982311
	15	M	M15	GSH	Compound M15	490	439.75	0.97236
	15	N	N15	GSH	Compound N15	476	425.75	0.941404
	15	O	O15	GSH	Compound O15	495	444.75	0.983416
	15	P	P15	GSH	Compound P15	501	450.75	0.996683
	16	A	A16	GSH	Compound A16	50.5	0.25	0.000552792
	16	B	B16	GSH	Compound B16	438	387.75	0.85738
	16	C	C16	GSH	Compound C16	494.5	444.25	0.982311
	16	D	D16	GSH	Compound D16	283	232.75	0.514649
	16	E	E16	GSH	Compound E16	500.5	450.25	0.995578
	16	F	F16	GSH	Compound F16	460.5	410.25	0.907131
	16	G	G16	GSH	Compound G16	455.5	405.25	0.896075
	16	H	H16	GSH	Compound H16	445	394.75	0.872858
	16	I	I16	GSH	Compound I16	499.5	449.25	0.993367
	16	J	J16	GSH	Compound J16	500	449.75	0.994472
	16	K	K16	GSH	Compound K16	30	-20.25	-0.0447761
	16	L	L16	GSH	Compound L16	482.5	432.25	0.955777
	16	M	M16	GSH	Compound M16	494.5	444.25	0.982311
	16	N	N16	GSH	Compound N16	490	439.75	0.97236
	16	O	O16	GSH	Compound O16	476	425.75	0.941404
	16	P	P16	GSH	Compound P16	495	444.75	0.983416
	17	A	A17	GSH	Compound A17	501	450.75	0.996683
	17	B	B17	GSH	Compound B17	50.5	0.25	0.000552792
	17	C	C17	GSH	Compound C17	438	387.75	0.85738
	17	D	D17	GSH	Compound D17	494.5	444.25	0.982311
	17	E	E17	GSH	Compound E17	283	232.75	0.514649
	17	F	F17	GSH	Compound F17	500.5	450.25	0.995578
	17	G	G17	GSH	Compound G17	460.5	410.25	0.907131
	17	H	H17	GSH	Compound H17	455.5	405.25	0.896075
	17	I	I17	GSH	Compound I17	445	394.75	0.872858
	17	J	J17	GSH	Compound J17	499.5	449.25	0.993367
	17	K	K17	GSH	Compound K17	500	449.75	0.994472
	17	L	L17	GSH	Compound L17	30	-20.25	-0.0447761
	17	M	M17	GSH	Compound M17	482.5	432.25	0.955777
	17	N	N17	GSH	Compound N17	494.5	444.25	0.982311
	17	O	O17	GSH	Compound O17	490	439.75	0.97236
	17	P	P17	GSH	Compound P17	476	425.75	0.941404
	18	A	A18	GSH	Compound A18	495	444.75	0.983416
	18	B	B18	GSH	Compound B18	501	450.75	0.996683
	18	C	C18	GSH	Compound C18	50.5	0.25	0.000552792
	18	D	D18	GSH	Compound D18	438	387.75	0.85738
	18	E	E18	GSH	Compound E18	494.5	444.25	0.982311
	18	F	F18	GSH	Compound F18	283	232.75	0.514649
	18	G	G18	GSH	Compound G18	500.5	450.25	0.995578
	18	H	H18	GSH	Compound H18	460.5	410.25	0.907131
	18	I	I18	GSH	Compound I18	455.5	405.25	0.896075
	18	J	J18	GSH	Compound J18	445	394.75	0.872858
	18	K	K18	GSH	Compound K18	499.5	449.25	0.993367
	18	L	L18	GSH	Compound L18	500	449.75	0.994472
	18	M	M18	GSH	Compound M18	30	-20.25	-0.0447761
	18	N	N18	GSH	Compound N18	482.5	432.25	0.955777
	18	O	O18	GSH	Compound O18	494.5	444.25	0.982311
	18	P	P18	GSH	Compound P18	490	439.75	0.97236
	19	A	A19	GSH	Compound A19	476	425.75	0.941404
	19	B	B19	GSH	Compound B19	495	444.75	0.983416
	19	C	C19	GSH	Compound C19	501	450.75	0.996683
	19	D	D19	GSH	Compound D19	50.5	0.25	0.000552792
	19	E	E19	GSH	Compound E19	438	387.75	0.85738
	19	F	F19	GSH	Compound F19	494.5	444.25	0.982311
	19	G	G19	GSH	Compound G19	283	232.75	0.514649
	19	H	H19	GSH	Compound H19	500.5	450.25	0.995578
	19	I	I19	GSH	Compound I19	460.5	410.25	0.907131
	19	J	J19	GSH	Compound J19	455.5	405.25	0.896075
	19	K	K19	GSH	Compound K19	445	394.75	0.872858
	19	L	L19	GSH	Compound L19	499.5	449.25	0.993367
	19	M	M19	GSH	Compound M19	500	449.75	0.994472
	19	N	N19	GSH	Compound N19	30	-20.25	-0.0447761
	19	O	O19	GSH	Compound O19	482.5	432.25	0.955777
	19	P	P19	GSH	Compound P19	494.5	444.25	0.982311
	20	A	A20	GSH	Compound A20	490	439.75	0.97236
	20	B	B20	GSH	Compound B20	476	425.75	0.941404
	20	C	C20	GSH	Compound C20	495	444.75	0.983416
	20	D	D20	GSH	Compound D20	501	450.75	0.996683
	20	E	E20	GSH	Compound E20	50.5	0.25	0.000552792
	20	F	F20	GSH	Compound F20	438	387.75	0.85738
	20	G	G20	GSH	Compound G20	494.5	444.25	0.982311
	20	H	H20	GSH	Compound H20	283	232.75	0.514649
	20	I	I20	GSH	Compound I20	500.5	450.25	0.995578
	20	J	J20	GSH	Compound J20	460.5	410.25	0.907131
	20	K	K20	GSH	Compound K20	455.5	405.25	0.896075
	20	L	L20	GSH	Compound L20	445	394.75	0.872858
	20	M	M20	GSH	Compound M20	499.5	449.25	0.993367
	20	N	N20	GSH	Compound N20	500	449.75	0.994472
	20	O	O20	GSH	Compound O20	30	-20.25	-0.0447761
	20	P	P20	GSH	Compound P20	482.5	432.25	0.955777
	21	A	A21	GSH	Compound A21	494.5	444.25	0.982311
	21	B	B21	GSH	Compound B21	490	439.75	0.97236
	21	C	C21	GSH	Compound C21	476	425.75	0.941404
	21	D	D21	GSH	Compound D21	495	444.75	0.983416
	21	E	E21	GSH	Compound E21	501	450.75	0.996683
	21	F	F21	GSH	Compound F21	50.5	0.25	0.000552792
	21	G	G21	GSH	Compound G21	438	387.75	0.85738
	21	H	H21	GSH	Compound H21	494.5	444.25	0.982311
	21	I	I21	GSH	Compound I21	283	232.75	0.514649
	21	J	J21	GSH	Compound J21	500.5	450.25	0.995578
	21	K	K21	GSH	Compound K21	460.5	410.25	0.907131
	21	L	L21	GSH	Compound L21	455.5	405.25	0.896075
	21	M	M21	GSH	Compound M21	445	394.75	0.872858
	21	N	N21	GSH	Compound N21	499.5	449.25	0.993367
	21	O	O21	GSH	Compound O21	500	449.75	0.994472
	21	P	P21	GSH	Compound P21	30	-20.25	-0.0447761
	22	A	A22	GSH	Compound A22	482.5	432.25	0.955777
	22	B	B22	GSH	Compound B22	494.5	444.25	0.982311
	22	C	C22	GSH	Compound C22	438	387.75	0.85738
	22	D	D22	GSH	Compound D22	494.5	444.25	0.982311
	22	E	E22	GSH	Compound E22	283	232.75	0.514649
	22	F	F22	GSH	Compound F22	500.5	450.25	0.995578
	22	G	G22	GSH	Compound G22	460.5	410.25	0.907131
	22	H	H22	GSH	Compound H22	455.5	405.25	0.896075
	22	I	I22	GSH	Compound I22	445	394.75	0.872858
	22	J	J22	GSH	Compound J22	499.5	449.25	0.993367
	22	K	K22	GSH	Compound K22	500	449.75	0.994472
	22	L	L22	GSH	Compound L22	30	-20.25	-0.0447761
	22	M	M22	GSH	Compound M22	482.5	432.25	0.955777
	22	N	N22	GSH	Compound N22	494.5	444.25	0.982311
	22	O	O22	GSH	Compound O22	482.5	432.25	0.955777
	22	P	P22	GSH	Compound P22	494.5	444.25	0.982311
	23	A	A23	GSH	DMSO	500	449.75	0.994472
	23	B	B23	GSH	DMSO	530	479.75	1.06081
	23	C	C23	GSH	DMSO	480	429.75	0.950249
	23	D	D23	GSH	DMSO	520	469.75	1.0387
	23	E	E23	GSH	DMSO	490	439.75	0.97236
	23	F	F23	GSH	DMSO	560	509.75	1.12714
	23	G	G23	GSH	DMSO	410	359.75	0.795467
	23	H	H23	GSH	DMSO	530	479.75	1.06081
	23	I	I23	GSH	DMSO	500	449.75	0.994472
	23	J	J23	GSH	DMSO	530	479.75	1.06081
	23	K	K23	GSH	DMSO	480	429.75	0.950249
	23	L	L23	GSH	DMSO	520	469.75	1.0387
	23	M	M23	GSH	DMSO	490	439.75	0.97236
	23	N	N23	GSH	DMSO	560	509.75	1.12714
	23	O	O23	GSH	DMSO	410	359.75	0.795467
	23	P	P23	GSH	DMSO	530	479.75	1.06081
	24	A	A24	GSH	DMSO	500	449.75	0.994472
	24	B	B24	GSH	DMSO	530	479.75	1.06081
	24	C	C24	GSH	DMSO	480	429.75	0.950249
	24	D	D24	GSH	DMSO	520	469.75	1.0387
	24	E	E24	GSH	DMSO	490	439.75	0.97236
	24	F	F24	GSH	DMSO	560	509.75	1.12714
	24	G	G24	GSH	DMSO	410	359.75	0.795467
	24	H	H24	GSH	DMSO	530	479.75	1.06081
	24	I	I24	GSH	DMSO	500	449.75	0.994472
	24	J	J24	GSH	DMSO	530	479.75	1.06081
	24	K	K24	GSH	DMSO	480	429.75	0.950249
	24	L	L24	GSH	DMSO	520	469.75	1.0387
	24	M	M24	GSH	DMSO	490	439.75	0.97236
	24	N	N24	GSH	DMSO	560	509.75	1.12714
	24	O	O24	GSH	DMSO	410	359.75	0.795467
	24	P	P24	GSH	DMSO	530	479.75	1.06081
